# Supplementary material
Source: Springer Nature journal article supplement (https://www.springermedizin.de/resource/supplementary/12968_2011_2606_MOESM3_ESM.pdf/9582308)

0.61cm OD 0.71cm OD 0.81cm OD

1cm

2.5 cm

5cm

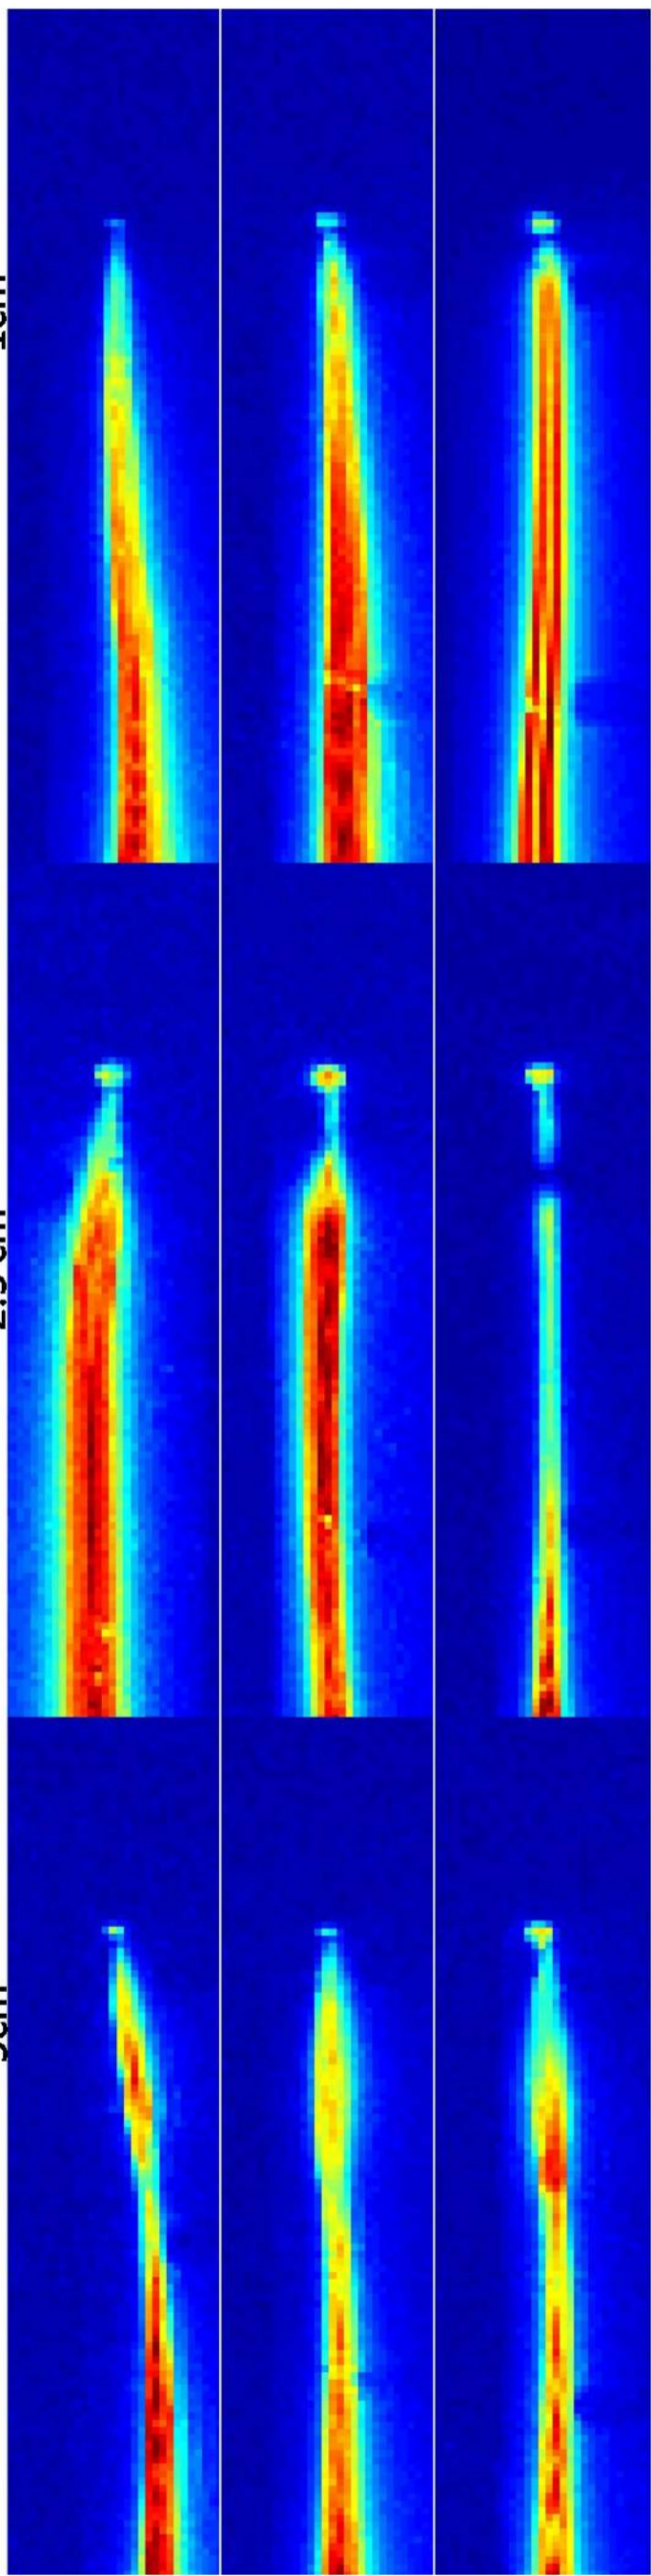

Supplement: MOESM3 [file 9582308]
